# Supplementary material for: Exploring cyclin-dependent kinase inhibitors: a comprehensive study in search of CDK-6 inhibitors using a pharmacophore modelling and dynamics approach
Source: Royal Society of Chemistry journal article supplement (doi:10.1039/d3ra05672d), 2023-01-01
Supplement: d3ra05672d1.pdf [file d3ra05672d1.pdf]

## Exploring Cyclin-Dependent Kinase Inhibitors: A Comprehensive Study in Search of CDK-6 Inhibitors using Pharmacophore Modelling and Dynamic Approach

Bharath Kumar Chagaleti,<sup>a</sup> Venkatesan Saravanan,<sup>a</sup> Chitra Vellapandian,<sup>b</sup> and Muthu K Kathiravan<sup>\*a,c</sup>

<sup>a</sup> Department of Pharmaceutical Chemistry, SRM College of Pharmacy, SRM Institute of Science and Technology, Kattankulathur-603203, India.

<sup>b</sup> Department of Pharmacology, SRM College of Pharmacy, SRMIST, Kattankulathur, Chennai, Tamil Nadu – 603 203, India

<sup>c</sup> Dr. A. P. J. Abdul Kalam Research Lab, Department of Pharmaceutical Chemistry, SRM College of Pharmacy, SRMIST, Kattankulathur, Chennai, Tamil Nadu – 603 203, India. E-mail: drmkathir@gmail.com

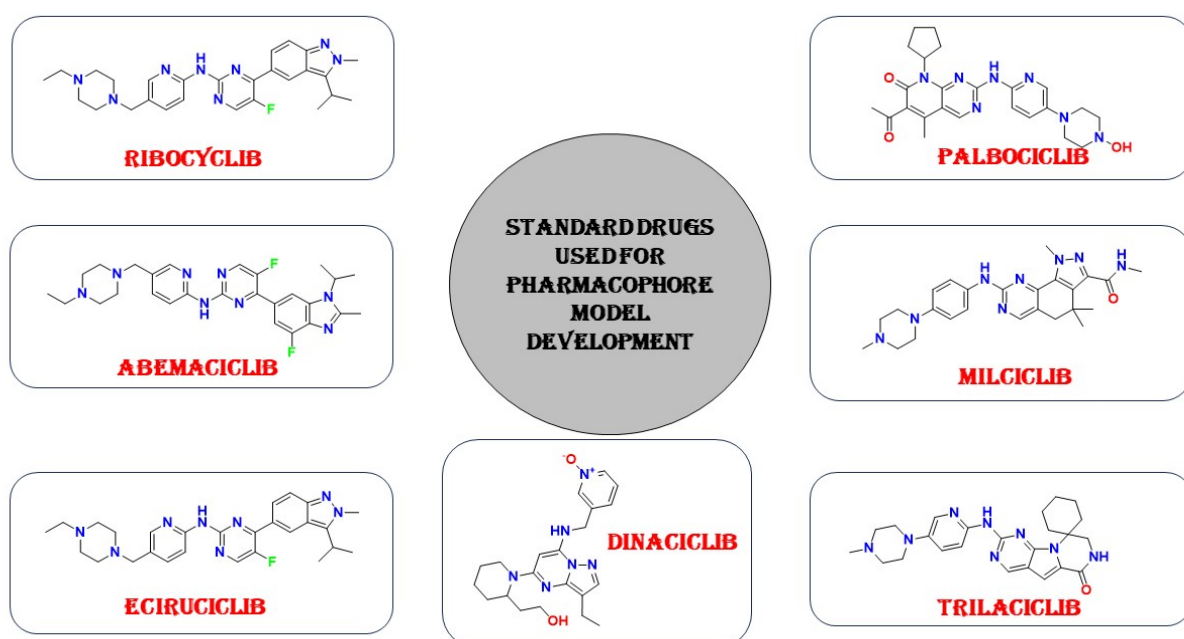

Fig. S1 Approved CDK inhibitor drugs used for Pharmacophore model development.

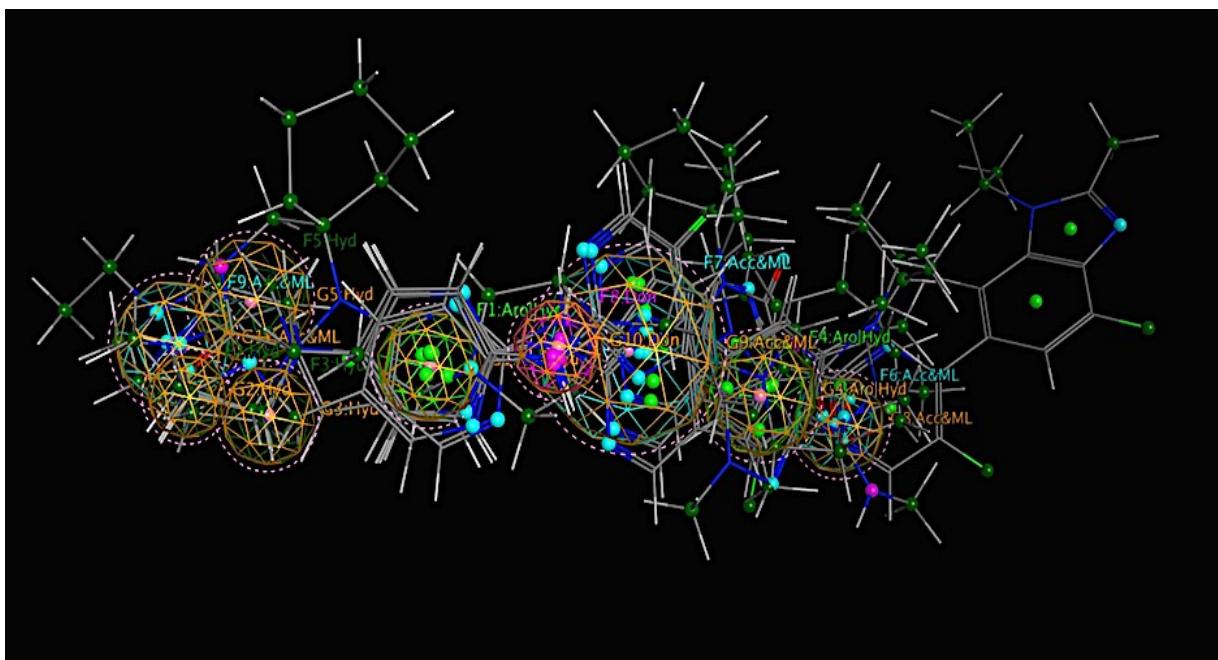

Fig. S2 Pharmacophoric features and Flexible alignment of standard drugs

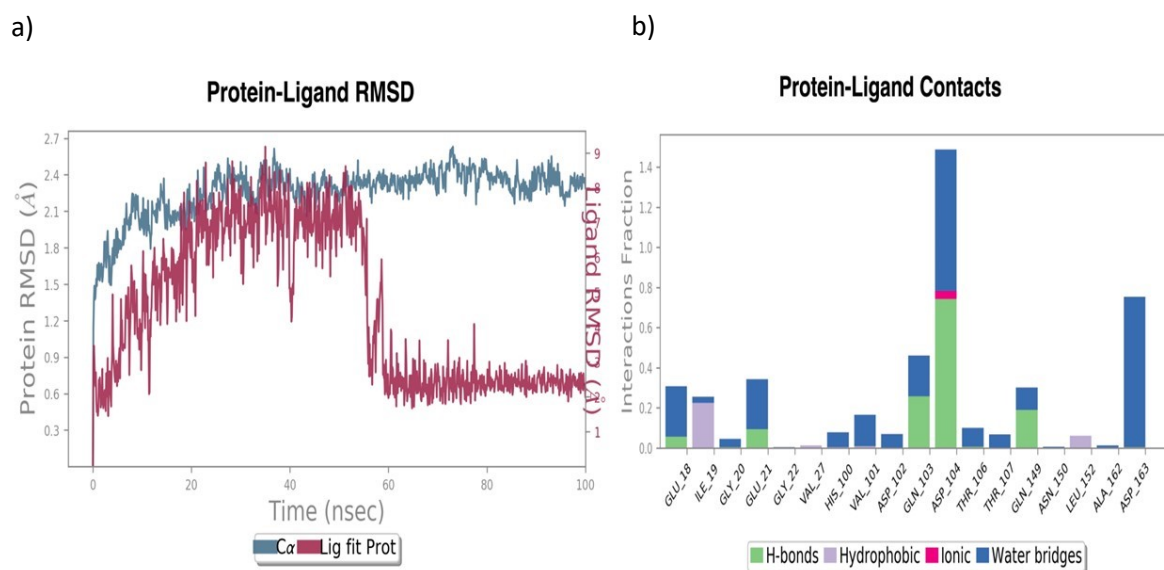

Fig. S3 a) RMSD plot of ligand fit protein of compound 18.

b) H-bond plot of compound 18.

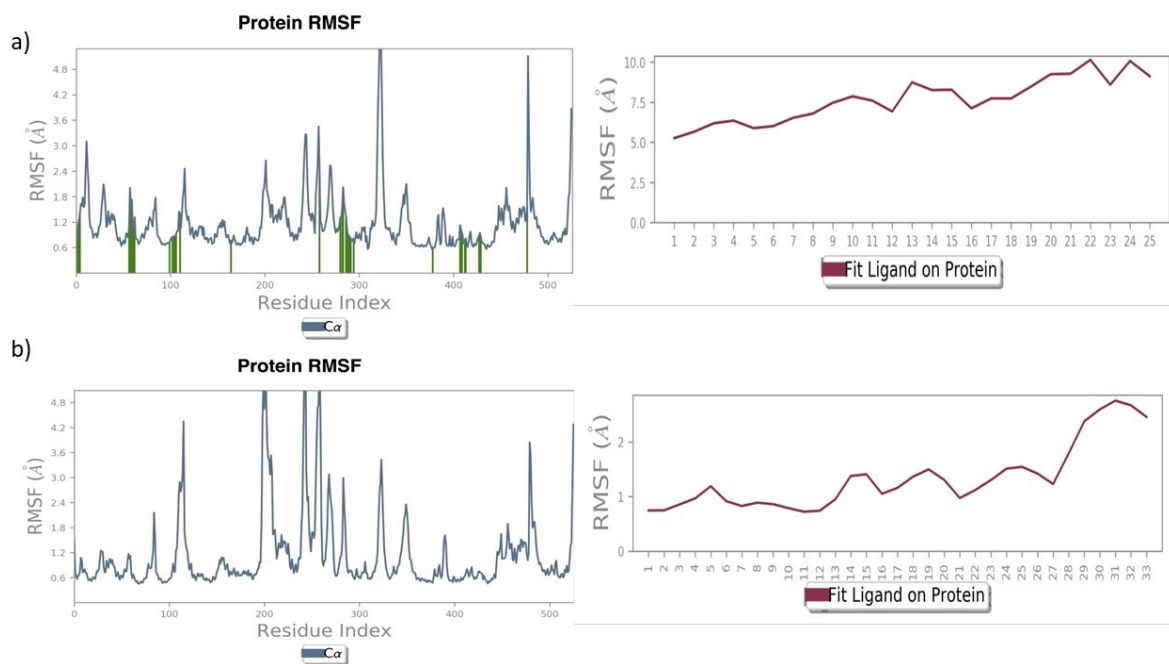

**Fig. S4** a) Protein RMSF Reference and Ligand RMSF of Compound-6

b) Protein RMSF Reference and Ligand RMSF of Standard.

**Table S1** Physico Chemical parameters of the designed compounds

| Ligand ID | log P | TPSA   | MW     | HBA | HBD | No of rotatable bonds | No of violations |
|-----------|-------|--------|--------|-----|-----|-----------------------|------------------|
| B1        | 1.54  | 90.04  | 314.74 | 4   | 2   | 2                     | 0                |
| B2        | 1.59  | 99.27  | 344.76 | 5   | 2   | 3                     | 0                |
| B3        | 2.22  | 90.04  | 349.18 | 4   | 2   | 2                     | 0                |
| B4        | 1.50  | 135.86 | 359.73 | 6   | 2   | 3                     | 0                |
| B5        | 1.48  | 110.27 | 330.74 | 5   | 3   | 2                     | 0                |

|     |      |        |        |   |   |   |   |
|-----|------|--------|--------|---|---|---|---|
| B6  | 0.88 | 119.50 | 360.76 | 6 | 3 | 3 | 0 |
| B7  | 1.08 | 119.50 | 360.76 | 6 | 3 | 3 | 0 |
| B8  | 0.78 | 130.50 | 346.73 | 6 | 4 | 2 | 0 |
| B9  | 0.98 | 130.50 | 346.73 | 6 | 4 | 2 | 0 |
| B10 | 0.51 | 150.72 | 362.73 | 7 | 5 | 2 | 0 |
| B11 | 1.55 | 99.27  | 344.76 | 5 | 2 | 3 | 0 |
| B12 | 1.57 | 99.27  | 344.76 | 5 | 2 | 3 | 0 |
| B13 | 1.36 | 108.51 | 374.79 | 6 | 2 | 4 | 0 |
| B14 | 1.56 | 108.51 | 374.79 | 6 | 2 | 4 | 0 |
| B15 | 1.37 | 117.74 | 404.81 | 7 | 2 | 5 | 0 |
| B16 | 1.17 | 110.27 | 404.81 | 7 | 2 | 5 | 0 |
| B17 | 1.03 | 130.50 | 330.74 | 5 | 3 | 2 | 0 |
| B18 | 0.51 | 150.72 | 346.73 | 6 | 4 | 2 | 0 |
| B19 | 0.28 | 110.27 | 362.73 | 7 | 5 | 2 | 0 |
| B20 | 1.06 | 90.04  | 330.74 | 5 | 3 | 2 | 0 |
| B21 | 1.99 | 90.04  | 328.76 | 4 | 2 | 2 | 0 |
| B22 | 2.32 | 90.04  | 393.63 | 4 | 2 | 2 | 0 |
| B23 | 2.17 | 90.04  | 349.18 | 4 | 2 | 2 | 0 |
| B24 | 2.19 | 90.04  | 349.18 | 4 | 2 | 2 | 0 |
| B25 | 2.80 | 90.04  | 383.63 | 4 | 2 | 2 | 0 |
| B26 | 3.43 | 90.04  | 418.07 | 4 | 2 | 2 | 0 |
| B27 | 0.25 | 102.93 | 315.72 | 5 | 2 | 2 | 0 |
| B28 | 0.37 | 102.93 | 315.72 | 5 | 2 | 2 | 0 |
| B29 | 0.80 | 103.18 | 304.70 | 5 | 2 | 2 | 0 |
| B30 | 2.35 | 90.04  | 393.63 | 4 | 2 | 2 | 0 |

**Table S2** Bioactivity score of designed compounds

| Ligand ID | GPCR ligand | Ion channel module | Kinase inhibitor | Nuclear receptor ligand | Protease inhibitor | Enzyme inhibitor |
|-----------|-------------|--------------------|------------------|-------------------------|--------------------|------------------|
| B1        | -0.12       | -0.42              | 0.01             | -1.07                   | -0.62              | -0.32            |
| B2        | -0.14       | -0.46              | -0.02            | -0.97                   | -0.59              | -0.35            |
| B3        | -0.10       | -0.41              | 0.00             | -1.02                   | -0.61              | -0.34            |
| B4        | -0.25       | -0.43              | -0.12            | -1.02                   | -0.65              | -0.40            |
| B5        | -0.10       | -0.38              | 0.01             | -0.90                   | -0.58              | -0.27            |
| B6        | -0.11       | -0.42              | 0.02             | -0.88                   | -0.59              | -0.28            |
| B7        | -0.13       | -0.39              | -0.01            | -0.94                   | -0.61              | -0.30            |
| B8        | -0.07       | -0.32              | 0.03             | -0.90                   | -0.56              | -0.24            |
| B9        | -0.08       | -0.36              | 0.04             | -0.78                   | -0.55              | -0.24            |
| B10       | -0.09       | -0.31              | 0.04             | -0.87                   | -0.53              | -0.20            |
| B11       | -0.15       | -0.45              | -0.06            | -0.97                   | -0.62              | -0.35            |
| B12       | -0.14       | -0.48              | -0.04            | -0.96                   | -0.60              | -0.35            |
| B13       | -0.16       | -0.44              | -0.08            | -0.97                   | -0.60              | -0.35            |
| B14       | -0.13       | -0.43              | -0.02            | -0.89                   | -0.56              | -0.31            |
| B15       | -0.17       | -0.42              | -0.07            | -0.94                   | -0.58              | -0.33            |
| B16       | -0.15       | -0.42              | -0.05            | -0.84                   | -0.57              | -0.31            |
| B17       | -0.06       | -0.37              | 0.05             | -0.85                   | -0.57              | -0.26            |
| B18       | -0.05       | -0.35              | 0.07             | -0.79                   | -0.53              | -0.23            |
| B19       | -0.07       | -0.34              | 0.07             | -0.84                   | -0.50              | -0.20            |
| B20       | -0.05       | -0.35              | 0.07             | -0.85                   | -0.56              | -0.25            |
| B21       | -0.15       | -0.48              | -0.03            | -1.04                   | -0.63              | -0.37            |
| B22       | -0.22       | -0.49              | -0.06            | -1.15                   | -0.72              | -0.40            |
| B23       | -0.12       | -0.44              | -0.11            | -1.00                   | -0.68              | -0.39            |
| B24       | -0.09       | -0.40              | -0.01            | -1.03                   | -0.61              | -0.34            |
| B25       | -0.09       | -0.39              | -0.14            | -0.95                   | -0.63              | -0.37            |
| B26       | -0.11       | -0.45              | -0.21            | -0.87                   | -0.67              | -0.35            |
| B27       | -0.09       | -0.37              | 0.10             | -1.09                   | -0.60              | -0.27            |
| B28       | -0.05       | -0.30              | 0.13             | -1.16                   | -0.58              | -0.28            |
| B29       | -0.31       | -0.67              | -0.33            | -1.33                   | -1.01              | -0.49            |

|            |       |       |       |       |       |       |
|------------|-------|-------|-------|-------|-------|-------|
| <b>B30</b> | -0.21 | -0.48 | -0.03 | -1.12 | -0.70 | -0.39 |
|------------|-------|-------|-------|-------|-------|-------|

**Table S3** ADMET Studies

| Ligand ID | LIVER TOXICITY |           | METABOLISM Cyp inhibitors |      |      |      |      |       | BB B | P-gp inhibitor | P-gp substrate | Herg Blocker | MM P | AMES |
|-----------|----------------|-----------|---------------------------|------|------|------|------|-------|------|----------------|----------------|--------------|------|------|
|           | DILI           | CYTOTOXIC | HL M                      | 1A 2 | 3A 4 | 2D 6 | 2E 9 | 2C1 9 |      |                |                |              |      |      |
| B1        | Yes            | No        | Yes                       | No   | No   | No   | No   | No    | Yes  | No             | No             | Yes          | No   | Yes  |
| B2        | Yes            | No        | Yes                       | No   | No   | No   | No   | No    | Yes  | Yes            | Yes            | No           | No   | Yes  |
| B3        | Yes            | No        | Yes                       | No   | No   | No   | No   | No    | Yes  | No             | No             | Yes          | No   | No   |
| B4        | Yes            | No        | Yes                       | No   | No   | No   | No   | No    | No   | No             | No             | No           | No   | Yes  |
| B5        | Yes            | No        | Yes                       | No   | No   | No   | No   | No    | Yes  | No             | No             | No           | No   | Yes  |
| B6        | Yes            | No        | Yes                       | No   | No   | No   | No   | No    | Yes  | Yes            | No             | No           | No   | No   |
| B7        | Yes            | No        | Yes                       | No   | No   | No   | No   | No    | No   | No             | Yes            | No           | No   | Yes  |
| B8        | Yes            | No        | Yes                       | No   | No   | No   | No   | No    | Yes  | No             | No             | No           | No   | Yes  |
| B9        | Yes            | No        | Yes                       | No   | No   | No   | No   | No    | No   | No             | No             | No           | No   | Yes  |
| B10       | Yes            | No        | Yes                       | No   | No   | No   | No   | No    | Yes  | No             | No             | No           | No   | Yes  |
| B11       | Yes            | No        | Yes                       | No   | No   | No   | No   | No    | Yes  | Yes            | Yes            | Yes          | No   | Yes  |
| B12       | Yes            | No        | No                        | No   | No   | No   | No   | No    | Yes  | Yes            | Yes            | Yes          | No   | Yes  |
| B13       | Yes            | No        | Yes                       | No   | No   | No   | No   | No    | No   | Yes            | Yes            | No           | No   | Yes  |
| B14       | Yes            | No        | Yes                       | No   | No   | No   | No   | No    | No   | No             | Yes            | Yes          | No   | Yes  |
| B15       | Yes            | No        | Yes                       | No   | No   | No   | No   | No    | No   | Yes            | Yes            | No           | No   | Yes  |
| B16       | Yes            | No        | Yes                       | No   | No   | No   | No   | No    | Yes  | No             | Yes            | Yes          | No   | Yes  |
| B17       | Yes            | No        | Yes                       | No   | No   | No   | No   | No    | Yes  | No             | No             | Yes          | No   | Yes  |
| B18       | Yes            | No        | Yes                       | No   | No   | No   | No   | No    | Yes  | No             | No             | No           | No   | Yes  |
| B19       | Yes            | No        | Yes                       | No   | No   | No   | No   | No    | Yes  | No             | No             | No           | No   | Yes  |
| B20       | Yes            | No        | Yes                       | No   | No   | No   | No   | No    | No   | No             | No             | No           | No   | No   |
| B21       | Yes            | No        | Yes                       | No   | No   | No   | No   | No    | Yes  | Yes            | No             | No           | No   | Yes  |
| B22       | Yes            | No        | Yes                       | No   | No   | No   | No   | No    | Yes  | Yes            | No             | Yes          | No   | Yes  |
| B23       | Yes            | No        | Yes                       | No   | No   | No   | No   | No    | Yes  | Yes            | No             | Yes          | No   | Yes  |
| B24       | Yes            | No        | Yes                       | No   | No   | No   | No   | No    | Yes  | Yes            | No             | Yes          | No   | No   |
| B25       | Yes            | No        | Yes                       | No   | No   | No   | No   | No    | Yes  | Yes            | No             | No           | No   | Yes  |
| B26       | Yes            | No        | Yes                       | No   | No   | No   | No   | No    | Yes  | Yes            | No             | No           | No   | No   |
| B27       | Yes            | No        | Yes                       | No   | No   | No   | No   | No    | Yes  | No             | No             | Yes          | No   | Yes  |
| B28       | Yes            | No        | Yes                       | No   | No   | No   | No   | No    | Yes  | No             | No             | Yes          | No   | Yes  |
| B29       | Yes            | No        | Yes                       | No   | No   | No   | No   | No    | Yes  | No             | No             | Yes          | No   | Yes  |
| B30       | Yes            | No        | Yes                       | No   | No   | No   | No   | No    | Yes  | Yes            | No             | No           | No   | Yes  |
